# Supplementary material for: Regorafenib monotherapy as the later-line treatment for elderly patients with metastatic colorectal cancer: a multicenter real-world study
Source: PubMed Central journal article supplement — J Gastrointest Oncol. 2024 Sep 23;15(5):2166–77. doi: 10.21037/jgo-24-464 (PMC11565098; doi:10.21037/jgo-24-464), 2024-09-23
Supplement: jgo-15-05-2166-dss.pdf [file jgo-15-05-2166-dss.pdf]

## Data Sharing Statement

|                     |                                                                                                                                                     |                                                                                                                   |
|---------------------|-----------------------------------------------------------------------------------------------------------------------------------------------------|-------------------------------------------------------------------------------------------------------------------|
| <b>Article Info</b> | <a href="https://dx.doi.org/10.21037/jgo-24-464">https://dx.doi.org/10.21037/jgo-24-464</a>                                                         |                                                                                                                   |
| <b>Item</b>         | <b>Question</b>                                                                                                                                     | <b>Authors' Response<br/>(place "-" if not applicable)</b>                                                        |
| 1                   | Would you like to share data collected for your study to others?                                                                                    | Yes.                                                                                                              |
| 2                   | If not, would you like to share the reason for your decision?                                                                                       | -                                                                                                                 |
| 3                   | What data in particular will be shared?                                                                                                             | The survival data in particular will be shared.                                                                   |
| 4                   | Any other documents will be shared? Such as study protocol, statistical analysis plan, informed consent form, clinical study report, analytic code. | Clinical study report will also be shared if requested.                                                           |
| 5                   | When will data availability begin?                                                                                                                  | From the publication date.                                                                                        |
| 6                   | When will data availability end?                                                                                                                    | One years within the publication date.                                                                            |
| 7                   | To whom will you share the data?                                                                                                                    | Medical oncologists.                                                                                              |
| 8                   | For what type of analysis or purpose?                                                                                                               | For analysis to evaluate the prognosis of Regorafenib monotherapy.                                                |
| 9                   | How or where can the data/documents be obtained?                                                                                                    | Emails could be sent to the corresponding author.                                                                 |
| 10                  | Any other restrictions?                                                                                                                             | We may balance the potential benefits and risks for each request and then provide the data that should be shared. |
