# Supplementary material for: Regorafenib monotherapy as the later-line treatment for elderly patients with metastatic colorectal cancer: a multicenter real-world study
Source: PubMed Central journal article supplement — J Gastrointest Oncol. 2024 Sep 23;15(5):2166–77. doi: 10.21037/jgo-24-464 (PMC11565098; doi:10.21037/jgo-24-464), 2024-09-23
Supplement: jgo-15-05-2166-rc.pdf [file jgo-15-05-2166-rc.pdf]

## STROBE Statement—checklist of items that should be included in reports of observational studies

| Section/item                 | Item No | Recommendation                                                                                                                                                                                                                                                                                                                                                                                                                                                         | Reported on Page Number/Line Number | Reported on Section/Paragraph             |
|------------------------------|---------|------------------------------------------------------------------------------------------------------------------------------------------------------------------------------------------------------------------------------------------------------------------------------------------------------------------------------------------------------------------------------------------------------------------------------------------------------------------------|-------------------------------------|-------------------------------------------|
| Title and abstract           | 1       | (a) Indicate the study's design with a commonly used term in the title or the abstract                                                                                                                                                                                                                                                                                                                                                                                 | P1/L2, P2/L42                       | Title, Abstract/ Methods                  |
|                              |         | (b) Provide in the abstract an informative and balanced summary of what was done and what was found                                                                                                                                                                                                                                                                                                                                                                    | P3/L62-66                           | Abstract/ Conclusions                     |
| Introduction                 |         |                                                                                                                                                                                                                                                                                                                                                                                                                                                                        |                                     |                                           |
| Background/<br>rationale     | 2       | Explain the scientific background and rationale for the investigation being reported                                                                                                                                                                                                                                                                                                                                                                                   | P4/73-100, P5/101-103               | Introduction/P1-3                         |
| Objectives                   | 3       | State specific objectives, including any prespecified hypotheses                                                                                                                                                                                                                                                                                                                                                                                                       | P5/104-108                          | Introduction/P4                           |
| Methods                      |         |                                                                                                                                                                                                                                                                                                                                                                                                                                                                        |                                     |                                           |
| Study design                 | 4       | Present key elements of study design early in the paper                                                                                                                                                                                                                                                                                                                                                                                                                | P5/112-114                          | Study design and outcome assessment/ P1   |
| Setting                      | 5       | Describe the setting, locations, and relevant dates, including periods of recruitment, exposure, follow-up, and data collection                                                                                                                                                                                                                                                                                                                                        | P5/112-120, P6/131,140-141          | Study design and outcome assessment/ P1,3 |
| Participants                 | 6       | (a) <b>Cohort study</b> —Give the eligibility criteria, and the sources and methods of selection of participants. Describe methods of follow-up<br><b>Case-control study</b> —Give the eligibility criteria, and the sources and methods of case ascertainment and control selection. Give the rationale for the choice of cases and controls<br><b>Cross-sectional study</b> —Give the eligibility criteria, and the sources and methods of selection of participants | P5/121-129, P6/130-143              | Study design and outcome assessment/ P2-3 |
|                              |         | (b) <b>Cohort study</b> —For matched studies, give matching criteria and number of exposed and unexposed<br><b>Case-control study</b> —For matched studies, give matching criteria and the number of controls per case                                                                                                                                                                                                                                                 | Not applicable                      | Not applicable                            |
| Variables                    | 7       | Clearly define all outcomes, exposures, predictors, potential confounders, and effect modifiers. Give diagnostic criteria, if applicable                                                                                                                                                                                                                                                                                                                               | P6/131-143                          | Study design and outcome assessment/ P3   |
| Data sources/<br>measurement | 8*      | For each variable of interest, give sources of data and details of methods of assessment (measurement). Describe comparability of assessment methods if there is more than one group                                                                                                                                                                                                                                                                                   | P6/131-132, 137-143                 | Study design and outcome assessment/ P3   |
| Bias                         | 9       | Describe any efforts to address potential sources of bias                                                                                                                                                                                                                                                                                                                                                                                                              | Not applicable                      | Not applicable                            |
| Study size                   | 10      | Explain how the study size was arrived at                                                                                                                                                                                                                                                                                                                                                                                                                              | Not applicable                      | Not applicable                            |
| Quantitative variables       | 11      | Explain how quantitative variables were handled in the analyses. If applicable, describe which groupings were chosen and why                                                                                                                                                                                                                                                                                                                                           | P6/146-147                          | Statistical Considerations/ P1            |

|                     |     |                                                                                                                                                                                                                                                                                                           |                                       |                                                     |
|---------------------|-----|-----------------------------------------------------------------------------------------------------------------------------------------------------------------------------------------------------------------------------------------------------------------------------------------------------------|---------------------------------------|-----------------------------------------------------|
| Statistical methods | 12  | (a) Describe all statistical methods, including those used to control for confounding                                                                                                                                                                                                                     | P6/145-158, P7/159-176                | Statistical Considerations/P1-3                     |
|                     |     | (b) Describe any methods used to examine subgroups and interactions                                                                                                                                                                                                                                       | P7/174-175                            | Statistical Considerations/P2                       |
|                     |     | (c) Explain how missing data were addressed                                                                                                                                                                                                                                                               | P6/145-146                            | Statistical Considerations/P1                       |
|                     |     | (d) <b>Cohort study</b> —If applicable, explain how loss to follow-up was addressed<br><b>Case-control study</b> —If applicable, explain how matching of cases and controls was addressed<br><b>Cross-sectional study</b> —If applicable, describe analytical methods taking account of sampling strategy | Not applicable                        | Not applicable                                      |
|                     |     | (e) Describe any sensitivity analyses                                                                                                                                                                                                                                                                     | P7/159-175                            | Statistical Considerations/P2                       |
| Results             |     |                                                                                                                                                                                                                                                                                                           |                                       |                                                     |
| Participants        | 13* | (a) Report numbers of individuals at each stage of study—eg numbers potentially eligible, examined for eligibility, confirmed eligible, included in the study, completing follow-up, and analysed                                                                                                         | P7/180-185                            | Patient characteristics/P1                          |
|                     |     | (b) Give reasons for non-participation at each stage                                                                                                                                                                                                                                                      | P7/180-185                            | Patient characteristics/P1                          |
|                     |     | (c) Consider use of a flow diagram                                                                                                                                                                                                                                                                        | P7/185                                | Patient characteristics/P1                          |
| Descriptive data    | 14* | (a) Give characteristics of study participants (eg demographic, clinical, social) and information on exposures and potential confounders                                                                                                                                                                  | P7/186-187, P8/188-196                | Patient characteristics/P2                          |
|                     |     | (b) Indicate number of participants with missing data for each variable of interest                                                                                                                                                                                                                       | P7/186                                | Patient characteristics/P2                          |
|                     |     | (c) <b>Cohort study</b> —Summarise follow-up time (eg, average and total amount)                                                                                                                                                                                                                          | P8/201-202                            | Survival analysis/P1                                |
| Outcome data        | 15* | <b>Cohort study</b> —Report numbers of outcome events or summary measures over time                                                                                                                                                                                                                       | P8/201-204                            | Survival analysis/P1                                |
|                     |     | <b>Case-control study</b> —Report numbers in each exposure category, or summary measures of exposure                                                                                                                                                                                                      | Not applicable                        | Not applicable                                      |
|                     |     | <b>Cross-sectional study</b> —Report numbers of outcome events or summary measures                                                                                                                                                                                                                        | Not applicable                        | Not applicable                                      |
| Main results        | 16  | (a) Give unadjusted estimates and, if applicable, confounder-adjusted estimates and their precision (eg, 95% confidence interval). Make clear which confounders were adjusted for and why they were included                                                                                              | P8/204-216, P9/217-230                | Survival analysis/P1-3                              |
|                     |     | (b) Report category boundaries when continuous variables were categorized                                                                                                                                                                                                                                 | P10/260-262                           | Age subgroup analysis/P1                            |
|                     |     | (c) If relevant, consider translating estimates of relative risk into absolute risk for a meaningful time period                                                                                                                                                                                          | Not applicable                        | Not applicable                                      |
| Other analyses      | 17  | Report other analyses done—eg analyses of subgroups and interactions, and sensitivity analyses                                                                                                                                                                                                            | P9/232-245, P10/246-272               | Sensitive analysis/P1-3, Age subgroup analysis/P1-2 |
| Discussion          |     |                                                                                                                                                                                                                                                                                                           |                                       |                                                     |
| Key results         | 18  | Summarise key results with reference to study objectives                                                                                                                                                                                                                                                  | P11/287-303, P12/304-332, P13/333-348 | Discussion/P1-6                                     |

|             |    |                                                                                                                                                            |             |               |
|-------------|----|------------------------------------------------------------------------------------------------------------------------------------------------------------|-------------|---------------|
| Limitations | 19 | Discuss limitations of the study, taking into account sources of potential bias or imprecision. Discuss both direction and magnitude of any potential bias | P13/349-359 | Discussion/P7 |
|-------------|----|------------------------------------------------------------------------------------------------------------------------------------------------------------|-------------|---------------|

|                   |    |                                                                                                                                                                            |                     |                 |
|-------------------|----|----------------------------------------------------------------------------------------------------------------------------------------------------------------------------|---------------------|-----------------|
| Interpretation    | 20 | Give a cautious overall interpretation of results considering objectives, limitations, multiplicity of analyses, results from similar studies, and other relevant evidence | P12/9-15            | Conclusion/P1   |
| Generalisability  | 21 | Discuss the generalisability (external validity) of the study results                                                                                                      | P10/12-29, P11/1-20 | Discussion/P2-3 |
| Other information |    |                                                                                                                                                                            |                     |                 |
| Funding           | 22 | Give the source of funding and the role of the funders for the present study and, if applicable, for the original study on which the present article is based              | Not applicable      | Not applicable  |

\*Give information separately for cases and controls in case-control studies and, if applicable, for exposed and unexposed groups in cohort and cross-sectional studies.

**Note:** An Explanation and Elaboration article discusses each checklist item and gives methodological background and published examples of transparent reporting. The STROBE checklist is best used in conjunction with this article (freely available on the Web sites of PLoS Medicine at <http://www.plosmedicine.org/>, Annals of Internal Medicine at <http://www.annals.org/>, and Epidemiology at <http://www.epidem.com/>). Information on the STROBE Initiative is available at [www.strobe-statement.org](http://www.strobe-statement.org).

Article information: <https://dx.doi.org/10.21037/jgo-24-464>

\*As the checklist was provided upon initial submission, the page number/line number reported may be changed due to copyediting and may not be referable in the published version. In this case, the section/paragraph may be used as an alternative reference.
