# Supplementary material for: Regorafenib monotherapy as the later-line treatment for elderly patients with metastatic colorectal cancer: a multicenter real-world study
Source: PubMed Central journal article supplement — J Gastrointest Oncol. 2024 Sep 23;15(5):2166–77. doi: 10.21037/jgo-24-464 (PMC11565098; doi:10.21037/jgo-24-464), 2024-09-23
Supplement: jgo-15-05-2166-supplementary.pdf [file jgo-15-05-2166-supplementary.pdf]

**Table S1** Proportion of elderly population ( $\geq 60$  years) treated with regorafenib monotherapy originating from each center (n=203)

| Center                                                 | N (%)      |
|--------------------------------------------------------|------------|
| Beijing Hospital                                       | 14 (6.90)  |
| The Affiliated Hospital of Hebei University            | 2 (0.99)   |
| The Fourth Hospital of Hebei Medical University        | 13 (6.40)  |
| Henan Cancer Hospital                                  | 27 (13.30) |
| Jiangsu Cancer Hospital                                | 29 (14.28) |
| The Affiliated Hospital of Qingdao University          | 29 (14.28) |
| Shandong Tumor Hospital                                | 11 (5.42)  |
| Tianjin People's Hospital                              | 10 (4.93)  |
| Cancer Hospital of Chinese Academy of Medical Sciences | 57 (28.08) |
| The First Hospital of China Medical University         | 11 (5.42)  |

**Table S2** Differential analysis of baseline characteristics in patients receiving different initial daily doses

| Characteristic            | Subgroup  | Initial daily dose, n (%) |              |               |               | P value |
|---------------------------|-----------|---------------------------|--------------|---------------|---------------|---------|
|                           |           | 40 mg (n=5)               | 80 mg (n=76) | 120 mg (n=43) | 160 mg (n=46) |         |
| Sex                       | Male      | 3 (60.00)                 | 54 (71.05)   | 36 (83.72)    | 33 (71.74)    | 0.38    |
|                           | Female    | 2 (40.00)                 | 22 (28.95)   | 7 (16.28)     | 13 (28.26)    |         |
| BMI (kg/m <sup>2</sup> )  | $\geq 22$ | 1 (50.00)                 | 37 (69.81)   | 12 (54.55)    | 25 (71.43)    | 0.52    |
|                           | $< 22$    | 1 (50.00)                 | 16 (30.19)   | 10 (45.45)    | 10 (28.57)    |         |
| ECOG score                | 0–1       | 5 (100.00)                | 74 (97.37)   | 39 (90.70)    | 42 (91.30)    | 0.35    |
|                           | 2–3       | 0 (0.00)                  | 2 (2.63)     | 4 (9.30)      | 4 (8.70)      |         |
| Tumor location            | Left      | 5 (100.00)                | 46 (74.19)   | 31 (91.18)    | 34 (89.47)    | 0.06    |
|                           | Right     | 0 (0.00)                  | 16 (25.81)   | 3 (8.82)      | 4 (10.53)     |         |
| Liver metastasis          | Positive  | 2 (40.00)                 | 46 (60.53)   | 22 (51.16)    | 23 (50.00)    | 0.55    |
|                           | Negative  | 3 (60.00)                 | 30 (39.47)   | 21 (48.84)    | 23 (50.00)    |         |
| Lung metastasis           | Positive  | 4 (80.00)                 | 41 (53.95)   | 29 (67.44)    | 29 (63.04)    | 0.37    |
|                           | Negative  | 1 (20.00)                 | 35 (46.05)   | 14 (32.56)    | 17 (36.96)    |         |
| RAS gene mutation status  | Wild type | 1 (50.00)                 | 25 (50.00)   | 12 (50.00)    | 10 (43.48)    | 0.96    |
|                           | Mutant    | 1 (50.00)                 | 25 (50.00)   | 12 (50.00)    | 13 (56.52)    |         |
| BRAF gene mutation status | Wild type | 3 (100.00)                | 34 (94.44)   | 19 (100.00)   | 16 (100.00)   | 0.54    |
|                           | Mutant    | 0 (0.00)                  | 2 (5.56)     | 0 (0.00)      | 0 (0.00)      |         |
| MMR gene status           | dMMR      | 1 (33.33)                 | 1 (2.50)     | 1 (4.76)      | 1 (4.76)      | 0.12    |
|                           | pMMR      | 2 (66.67)                 | 39 (97.50)   | 20 (95.24)    | 20 (95.24)    |         |
| Prior-anti VEGF therapy   | Used      | 4 (80.00)                 | 55 (74.32)   | 31 (72.09)    | 32 (69.57)    | 0.93    |
|                           | Not used  | 1 (20.00)                 | 19 (25.68)   | 12 (27.91)    | 14 (30.43)    |         |

We defined factors with  $P < 0.05$  as significant. BMI, body mass index; ECOG, Eastern Cooperative Oncology Group; RAS, Rat sarcoma; BRAF, V-Raf Murine Sarcoma Viral Oncogene Homolog B; MMR, mismatch repair; dMMR, deficiency of MMR; pMMR, proficiency of MMR; VEGF, vascular endothelial growth factor.

**Table S3** Differential analysis of baseline characteristics in patients receiving different final daily doses

| Characteristic            | Subgroup  | Final daily dose, n (%) |               |               | P value |
|---------------------------|-----------|-------------------------|---------------|---------------|---------|
|                           |           | 80 mg (n=51)            | 120 mg (n=37) | 160 mg (n=28) |         |
| Sex                       | Male      | 32 (62.75)              | 32 (86.49)    | 20 (71.43)    | 0.049   |
|                           | Female    | 19 (37.25)              | 5 (13.51)     | 8 (28.57)     |         |
| BMI (kg/m <sup>2</sup> )  | ≥22       | 24 (63.16)              | 13 (65.00)    | 15 (78.95)    | 0.47    |
|                           | <22       | 14 (36.84)              | 7 (35.00)     | 4 (21.05)     |         |
| ECOG score                | 0–1       | 49 (96.08)              | 35 (94.59)    | 25 (89.29)    | 0.47    |
|                           | 2–3       | 2 (3.92)                | 2 (5.41)      | 3 (10.71)     |         |
| Tumor location            | Left      | 30 (73.17)              | 29 (90.62)    | 22 (91.67)    | 0.07    |
|                           | Right     | 11 (26.83)              | 3 (9.38)      | 2 (8.33)      |         |
| Liver metastasis          | Positive  | 32 (62.75)              | 18 (48.65)    | 19 (67.86)    | 0.24    |
|                           | Negative  | 19 (37.25)              | 19 (51.35)    | 9 (32.14)     |         |
| Lung metastasis           | Positive  | 32 (62.75)              | 23 (62.16)    | 20 (71.43)    | 0.69    |
|                           | Negative  | 19 (37.25)              | 14 (37.84)    | 8 (28.57)     |         |
| RAS gene mutation status  | Wild type | 17 (48.57)              | 9 (40.91)     | 7 (41.18)     | 0.81    |
|                           | Mutant    | 18 (51.43)              | 13 (59.09)    | 10 (58.82)    |         |
| BRAF gene mutation status | Wild type | 22 (91.67)              | 15 (100.00)   | 14 (100.00)   | 0.29    |
|                           | Mutant    | 2 (8.33)                | 0 (0.00)      | 0 (0.00)      |         |
| MMR gene status           | dMMR      | 1 (4.35)                | 2 (12.50)     | 0 (0.00)      | 0.29    |
|                           | pMMR      | 22 (95.65)              | 14 (87.50)    | 16 (100.00)   |         |
| Prior-anti VEGF therapy   | Used      | 41 (80.39)              | 25 (67.57)    | 20 (71.43)    | 0.37    |
|                           | Not used  | 10 (19.61)              | 12 (32.43)    | 8 (28.57)     |         |

We defined factors with  $P < 0.05$  as significant. BMI, body mass index; ECOG, Eastern Cooperative Oncology Group; RAS, Rat sarcoma; BRAF, V-Raf Murine Sarcoma Viral Oncogene Homolog B; MMR, mismatch repair; dMMR, deficiency of MMR; pMMR, proficiency of MMR; VEGF, vascular endothelial growth factor.

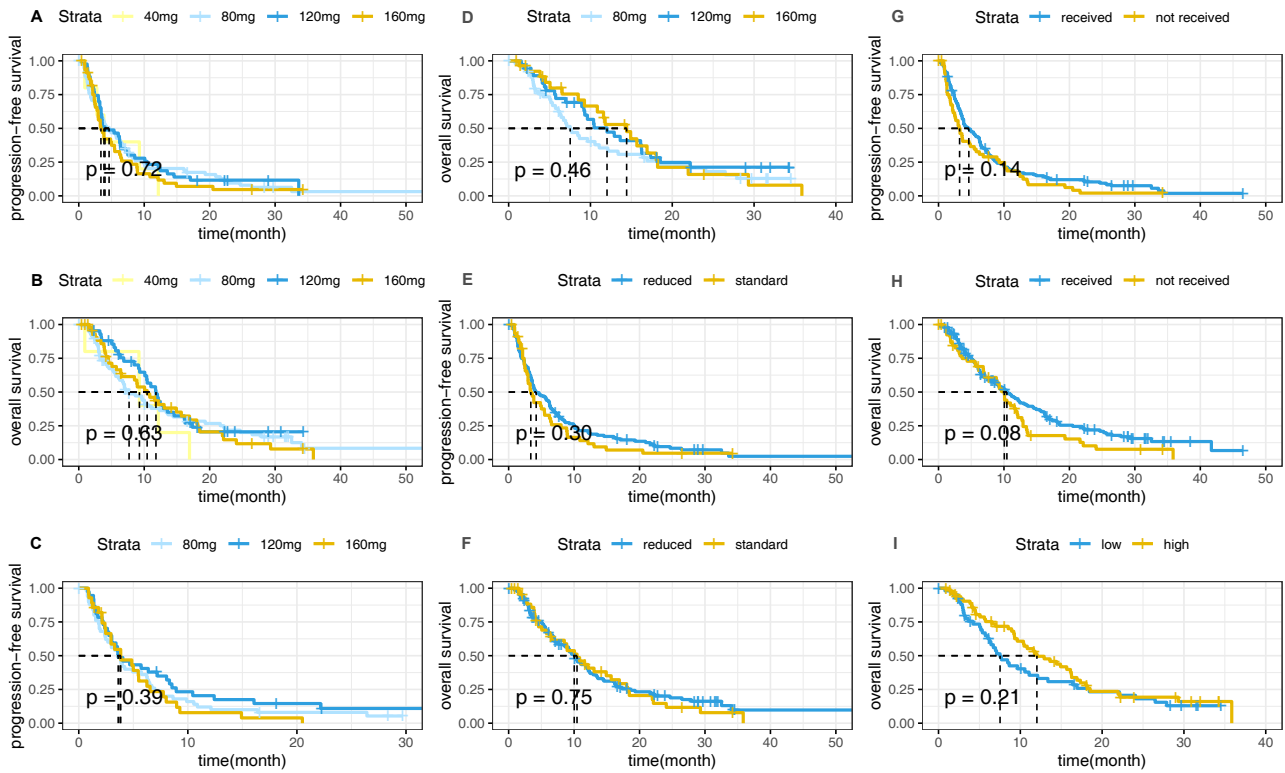

**Figure S1** Survival analysis of elderly population ( $\geq 60$  years) treated with regorafenib monotherapy after grouping by medication characteristics. (A,B) Grouped by initial daily dose. (C,D) Grouped by final daily dose. (E,F) Grouped into standard-dose and reduced-dose groups by initial daily dose. (G,H) Grouped by whether or not they had been treated with anti-VEGF therapy. (I) Grouped into high- and low-dose groups by final daily dose. VEGF, vascular endothelial growth factor.

**Table S4** Univariate and multivariate analyses of PFS in elderly population ( $\geq 60$  years) treated with regorafenib monotherapy

| Subgroup                         | N (%)       | Univariate analysis |         | Multivariate analysis    |         |                          |         |                    |         |
|----------------------------------|-------------|---------------------|---------|--------------------------|---------|--------------------------|---------|--------------------|---------|
|                                  |             |                     |         | Final daily dose-Model 1 |         | Final daily dose-Model 2 |         | Initial daily dose |         |
|                                  |             | HR (95% CI)         | P value | HR (95% CI)              | P value | HR (95% CI)              | P value | HR (95% CI)        | P value |
| <b>Sex</b>                       |             |                     |         |                          |         |                          |         |                    |         |
| Male                             | 152 (74.88) | 1                   |         |                          |         | 1                        |         |                    |         |
| Female                           | 51 (25.12)  | 0.87 (0.62–1.22)    | 0.43    |                          |         | 1.04 (0.61–1.79)         | 0.88    |                    |         |
| <b>BMI (kg/m<sup>2</sup>)</b>    |             |                     |         |                          |         |                          |         |                    |         |
| $\geq 22$                        | 85 (65.89)  | 1                   |         |                          |         |                          |         |                    |         |
| <22                              | 44 (34.11)  | 1.00 (0.68–1.46)    | 0.98    |                          |         |                          |         |                    |         |
| <b>ECOG score</b>                |             |                     |         |                          |         |                          |         |                    |         |
| 0–1                              | 190 (93.60) | 1                   |         |                          |         |                          |         |                    |         |
| 2–3                              | 13 (6.40)   | 1.01 (0.56–1.81)    | 0.98    |                          |         |                          |         |                    |         |
| <b>Tumor location</b>            |             |                     |         |                          |         |                          |         |                    |         |
| Left                             | 134 (82.21) | 1                   |         | 1                        |         | 1                        |         | 1                  |         |
| Right                            | 29 (17.79)  | 0.74 (0.48–1.15)    | 0.18    | 0.72 (0.37–1.38)         | 0.32    | 0.71 (0.36–1.40)         | 0.34    | 0.96 (0.57–1.62)   | 0.87    |
| <b>Liver metastasis</b>          |             |                     |         |                          |         |                          |         |                    |         |
| Positive                         | 103 (50.74) | 1                   |         | 1                        |         | 1                        |         | 1                  |         |
| Negative                         | 100 (49.26) | 0.79 (0.59–1.06)    | 0.11    | 1.09 (0.69–1.72)         | 0.70    | 1.09 (0.69–1.72)         | 0.72    | 0.94 (0.66–1.35)   | 0.75    |
| <b>Lung metastasis</b>           |             |                     |         |                          |         |                          |         |                    |         |
| Positive                         | 118 (58.13) | 1                   |         | 1                        |         | 1                        |         | 1                  |         |
| Negative                         | 85 (41.87)  | 0.63 (0.47–0.85)    | 0.002   | 0.56 (0.35–0.88)         | 0.01    | 0.55 (0.35–0.88)         | 0.01    | 0.63 (0.43–0.92)   | 0.02    |
| <b>RAS gene mutation status</b>  |             |                     |         |                          |         |                          |         |                    |         |
| Wild type                        | 59 (51.30)  | 1                   |         |                          |         |                          |         |                    |         |
| Mutant                           | 56 (48.70)  | 1.01 (0.69–1.49)    | 0.95    |                          |         |                          |         |                    |         |
| <b>BRAF gene mutation status</b> |             |                     |         |                          |         |                          |         |                    |         |
| Wild type                        | 81 (96.43)  | 1                   |         |                          |         |                          |         |                    |         |
| Mutant                           | 3 (3.57)    | 0.74 (0.23–2.38)    | 0.62    |                          |         |                          |         |                    |         |
| <b>MMR gene status</b>           |             |                     |         |                          |         |                          |         |                    |         |
| dMMR                             | 5 (5.10)    | 1                   |         |                          |         |                          |         |                    |         |
| pMMR                             | 93 (94.90)  | 1.21 (0.48–3.04)    | 0.69    |                          |         |                          |         |                    |         |
| <b>Prior-anti VEGF therapy</b>   |             |                     |         |                          |         |                          |         |                    |         |
| Used                             | 146 (73.00) | 1                   |         | 1                        |         | 1                        |         | 1                  |         |
| Not used                         | 54 (27.00)  | 1.28 (0.92–1.77)    | 0.14    | 1.11 (0.67–1.83)         | 0.70    | 1.11 (0.67–1.86)         | 0.68    | 1.03 (0.68–1.56)   | 0.88    |
| <b>Final daily dose</b>          |             |                     |         |                          |         |                          |         |                    |         |
| 160 mg                           | 28 (24.14)  | 1                   |         | 1                        |         | 1                        |         |                    |         |
| 120 mg                           | 37 (31.90)  | 0.71 (0.42–1.19)    | 0.19    | 0.71 (0.40–1.27)         | 0.25    | 0.72 (0.40–1.30)         | 0.27    |                    |         |
| 80 mg                            | 51 (43.96)  | 0.90 (0.56–1.46)    | 0.67    | 1.15 (0.66–2.02)         | 0.63    | 1.15 (0.65–2.01)         | 0.64    |                    |         |
| <b>Initial daily dose</b>        |             |                     |         |                          |         |                          |         |                    |         |
| 160 mg                           | 46 (27.06)  | 1                   |         |                          |         |                          |         | 1                  |         |
| 120 mg                           | 43 (25.29)  | 0.80 (0.51–1.23)    | 0.31    |                          |         |                          |         | 0.76 (0.46–1.24)   | 0.27    |
| 80 mg                            | 76 (44.71)  | 0.83 (0.57–1.23)    | 0.36    |                          |         |                          |         | 0.99 (0.64–1.54)   | 0.97    |
| 40 mg                            | 5 (2.94)    | 1.02 (0.40–2.59)    | 0.96    |                          |         |                          |         | 0.93 (0.36–2.41)   | 0.88    |

We initially identified the variables associated with outcomes ( $P < 0.20$ ) through a univariate analysis. Variables with a  $P$  value  $< 0.20$  in the univariate analysis were adjusted in the Model 1. Variables with a  $P$  value  $< 0.20$  in the univariate analysis and those with a  $P$  value  $< 0.05$  from the differential analysis were adjusted in the Model 2. PFS, progression-free survival; BMI, body mass index; ECOG, Eastern Cooperative Oncology Group; RAS, Rat sarcoma; BRAF, V-Raf Murine Sarcoma Viral Oncogene Homolog B; MMR, mismatch repair; dMMR, deficiency of MMR; pMMR, proficiency of MMR; VEGF, vascular endothelial growth factor; HR, hazard ratio; 95% CI, 95% confidence interval.

**Table S5** Patient characteristics before and after PSM

| Subgroup                 | Unmatched data           |                           |         |      | Matched data             |                           |         |        |
|--------------------------|--------------------------|---------------------------|---------|------|--------------------------|---------------------------|---------|--------|
|                          | Low dose (n=51)<br>N (%) | High dose (n=65)<br>N (%) | P value | SMD  | Low dose (n=26)<br>N (%) | High dose (n=26)<br>N (%) | P value | SMD    |
| Lung metastasis          |                          |                           | 0.85    | 0.07 |                          |                           | >0.99   | <0.001 |
| Positive                 | 32 (62.75)               | 43 (66.15)                |         |      | 16 (61.54)               | 16 (61.54)                |         |        |
| Negative                 | 19 (37.25)               | 22 (33.85)                |         |      | 10 (38.46)               | 10 (38.46)                |         |        |
| Sex                      |                          |                           | 0.06    | 0.39 |                          |                           | >0.99   | <0.001 |
| Male                     | 32 (62.75)               | 52 (80.00)                |         |      | 19 (73.08)               | 19 (73.08)                |         |        |
| Female                   | 19 (37.25)               | 13 (20.00)                |         |      | 7 (26.92)                | 7 (26.92)                 |         |        |
| RAS gene mutation status |                          |                           | 0.68    | 0.15 |                          |                           | >0.99   | <0.001 |
| Wild type                | 17 (48.57)               | 16 (41.03)                |         |      | 12 (46.15)               | 12 (46.15)                |         |        |
| Mutant                   | 18 (51.43)               | 23 (58.97)                |         |      | 14 (53.85)               | 14 (53.85)                |         |        |
| Prior anti-VEGF therapy  |                          |                           | 0.25    | 0.26 |                          |                           | >0.99   | <0.001 |
| Used                     | 41 (80.39)               | 45 (69.23)                |         |      | 20 (76.92)               | 20 (76.92)                |         |        |
| Not used                 | 10 (19.61)               | 20 (30.77)                |         |      | 6 (23.08)                | 6 (23.08)                 |         |        |

PSM, propensity score matching; SMD, standardized mean difference; RAS, Rat sarcoma; VEGF, vascular endothelial growth factor.

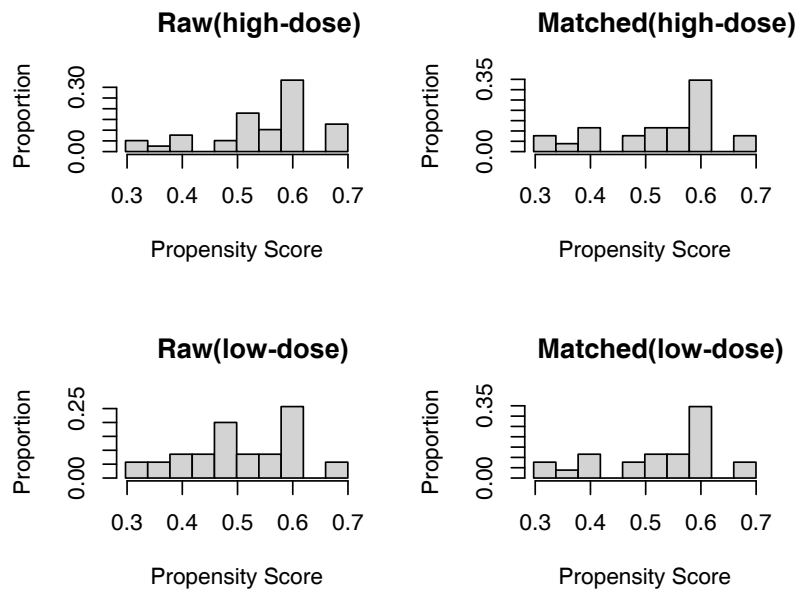

**Figure S2** Histogram of propensity score for the final daily dose groups before and after PSM. PSM, propensity score matching.

### Distribution of Propensity Scores

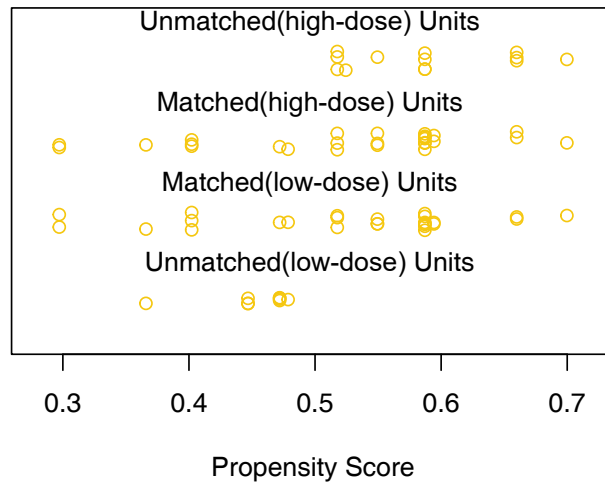

**Figure S3** Jitter plot of propensity score for the final daily dose groups before and after PSM. PSM, propensity score matching.

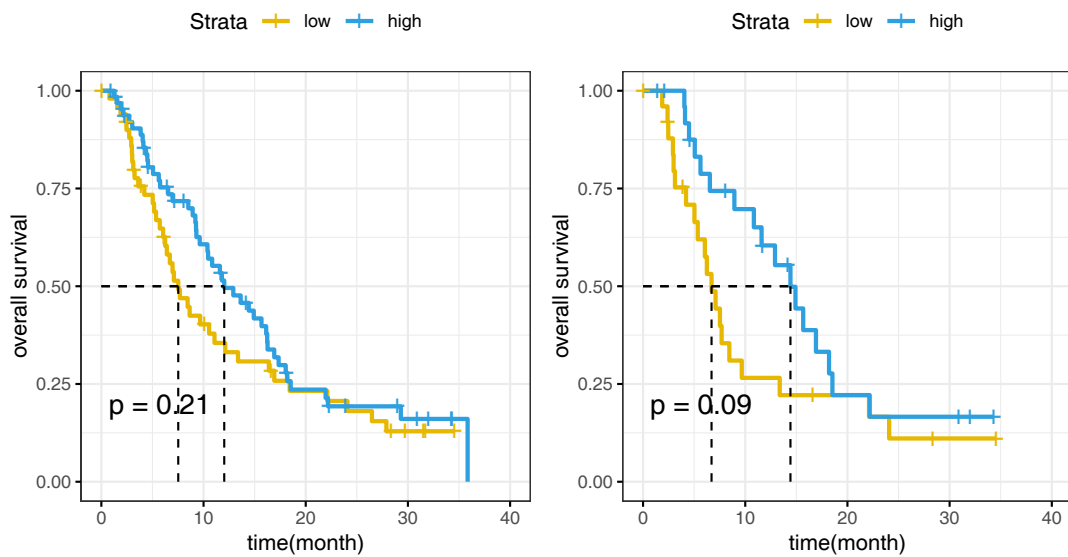

**Figure S4** Survival analysis before and after PSM with final daily dose divided into high- and low-dose groups. (A) Before matching. (B) After matching. PSM, propensity score matching.

**A. Male**

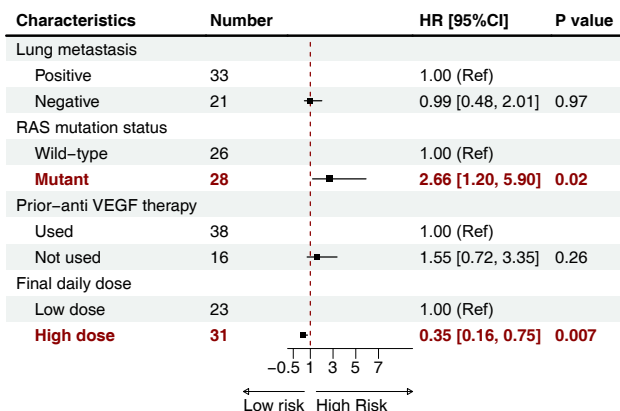

**B. Female**

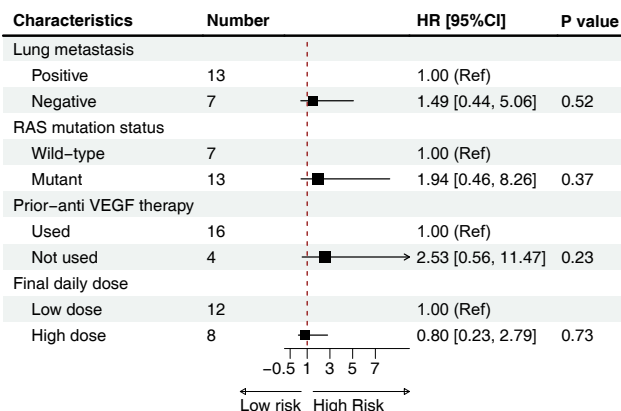

**Figure S5** Results of Cox multivariate analysis for overall survival in elderly patients treated with regorafenib monotherapy, stratified by sex, in relation to the final daily dose. (A) Male. (B) Female. RAS, Rat sarcoma; VEGF, vascular endothelial growth factor; HR, hazard ratio; Ref, reference; 95% CI, 95% confidence interval.

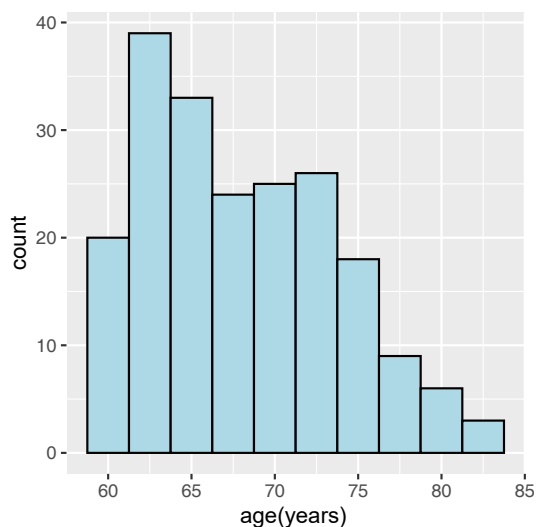

**Figure S6** Age distribution of the elderly population (≥60 years) treated with regorafenib monotherapy.

**A. ≥70**

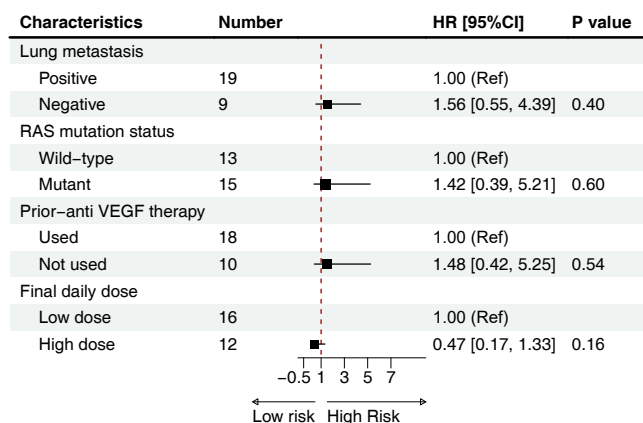

**B. <70**

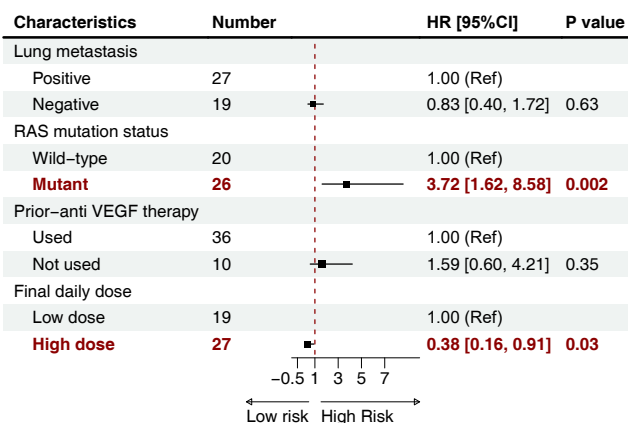

**Figure S7** Results of Cox multivariate analysis for overall survival in elderly patients treated with regorafenib monotherapy, stratified by age (cut-off value: 70 years), in relation to the final daily dose. (A) ≥70. (B) <70. RAS, Rat sarcoma; VEGF, vascular endothelial growth factor; HR, hazard ratio; Ref, reference; 95% CI, 95% confidence interval.

**Table S6** Characterization of adverse events in the elderly population (six centers\*, n=77)

| Characteristic          | Subgroup                             | N (%)      |
|-------------------------|--------------------------------------|------------|
| Grade of adverse events | No adverse events                    | 41 (53.25) |
|                         | Grade I                              | 15 (19.48) |
|                         | Grade II                             | 12 (15.58) |
|                         | Grade III                            | 9 (11.69)  |
| Adverse events          | Fatigue                              | 14 (18.18) |
|                         | Loss of appetite                     | 14 (18.18) |
|                         | Hands and feet skin reactions (HFRS) | 8 (10.39)  |
|                         | Hypertension                         | 6 (7.79)   |
|                         | Diarrhea                             | 6 (7.79)   |
|                         | Liver damage                         | 5 (6.49)   |
|                         | Fever                                | 4 (5.19)   |
|                         | Hemorrhage                           | 3 (3.90)   |

\*Six centers: Beijing Hospital, The Affiliated Hospital of Hebei University, The Fourth Hospital of Hebei Medical University, Henan Cancer Hospital, Shandong Tumor Hospital and Tianjin People's Hospital.



**Table S7** Differential analysis of adverse events with baseline characteristics and dose of medication in elderly population ( $\geq 60$  years) treated with regorafenib monotherapy

| Characteristic           | Subgroup   | No adverse events (n=41), N (%) | Adverse event (n=36), N (%) | P value |
|--------------------------|------------|---------------------------------|-----------------------------|---------|
| Sex                      | Male       | 29 (70.73)                      | 25 (69.44)                  | 1.00    |
|                          | Female     | 12 (29.27)                      | 11 (30.56)                  |         |
| Age (years)              | $\geq 70$  | 12 (29.27)                      | 15 (41.67)                  | 0.37    |
|                          | $< 70$     | 29 (70.73)                      | 21 (58.33)                  |         |
| BMI (kg/m <sup>2</sup> ) | $\geq 22$  | 12 (75.00)                      | 13 (72.22)                  | 1.00    |
|                          | $< 22$     | 4 (25.00)                       | 5 (27.78)                   |         |
| ECOG score               | 0/1        | 38 (92.68)                      | 34 (94.44)                  | 1.00    |
|                          | 2/3        | 3 (7.32)                        | 2 (5.56)                    |         |
| Final daily dose         | 80 mg      | 10 (62.50)                      | 6 (31.58)                   | 0.14    |
|                          | 120–160 mg | 6 (37.50)                       | 13 (68.42)                  |         |
| Initial daily dose       | 40–120 mg  | 26 (83.87)                      | 18 (64.29)                  | 0.15    |
|                          | 160 mg     | 5 (16.13)                       | 10 (35.71)                  |         |

We defined factors with  $P < 0.05$  as significant. BMI, body mass index; ECOG, Eastern Cooperative Oncology Group.
